1  
2  
3  
4  
5  
6  
7  
8  
9  
10  
11  
12  
13  
14  
15  
16  
17  
18  
19  
20  
21  
22  
23  
24  
25  
26  
27

**Drug resistance mechanisms create targetable proteostatic vulnerabilities in Her2+ breast cancers**

Navneet Singh<sup>1,2</sup>, Lindsey Romick-Rosendale<sup>3</sup>, Miki Watanabe-Chailland<sup>3</sup>, Lisa M. Privette Vinnedge<sup>4,5</sup>, Kakajan Komurov<sup>1,5,6</sup>

<sup>1</sup> Division of Experimental Hematology and Cancer Biology, Cancer and Blood Diseases Institute, Cincinnati Children’s Hospital Medical Center, Cincinnati, OH 45229

<sup>2</sup> Current: Case Comprehensive Cancer Center, Case Western Reserve University, Cleveland, OH 44106

<sup>3</sup> Division of Pathology and Laboratory Medicine, Cincinnati Children’s Hospital Medical Center, Cincinnati, OH 45229

<sup>4</sup> Division of Oncology, Cancer and Blood Diseases Institute, Cincinnati Children’s Hospital Medical Center, Cincinnati, OH 45229

<sup>5</sup> Department of Pediatrics, University of Cincinnati College of Medicine, Cincinnati, OH

<sup>6</sup> Current: Champions Oncology Inc, Hackensack NJ

Correspondence:

Kakajan Komurov, Ph.D: [komurov@hotmail.com](mailto:komurov@hotmail.com)

Lisa M. Privette Vinnedge, Ph.D: [lisa.privette@cchmc.org](mailto:lisa.privette@cchmc.org)

28 **Abstract**

29 Oncogenic kinase inhibitors show short-lived responses in the clinic due to high rate of acquired  
30 resistance. We previously showed that pharmacologically exploiting oncogene-induced  
31 proteotoxic stress can be a viable alternative to oncogene-targeted therapy. Here, we performed  
32 extensive analyses of the transcriptomic, metabolomic and proteostatic perturbations during the  
33 course of treatment of Her2+ breast cancer cells with a Her2 inhibitor covering the drug response,  
34 resistance, relapse and drug withdrawal phases. We found that acute Her2 inhibition, in addition  
35 to blocking mitogenic signaling, leads to significant decline in the glucose uptake, and shutdown  
36 of glycolysis and of global protein synthesis. During prolonged therapy, compensatory  
37 overexpression of Her3 allows for the reactivation of mitogenic signaling pathways, but fails to re-  
38 engage the glucose uptake and glycolysis, resulting in proteotoxic ER stress, which maintains the  
39 protein synthesis block and growth inhibition. Her3-mediated cell proliferation under ER stress  
40 during prolonged Her2 inhibition is enabled due to the overexpression of the eIF2 phosphatase  
41 GADD34, which uncouples protein synthesis block from the ER stress response to allow for active  
42 cell growth. We show that this imbalance in the mitogenic and proteostatic signaling created  
43 during the acquired resistance to anti-Her2 therapy imposes a specific vulnerability to the  
44 inhibition of the endoplasmic reticulum quality control machinery. The latter is more pronounced  
45 in the drug withdrawal phase, where the de-inhibition of Her2 creates an acute surge in the  
46 downstream signaling pathways and exacerbates the proteostatic imbalance. Therefore, the  
47 acquired resistance mechanisms to oncogenic kinase inhibitors may create secondary  
48 vulnerabilities that could be exploited in the clinic.

49

## 50 Introduction

51 The Her2 (*ERBB2*) receptor tyrosine kinase is amplified in 15-20% of breast cancers, and  
52 historically has correlated with poor prognosis. Her2 is a member of the EGFR (epidermal growth  
53 factor receptor) family of receptor tyrosine kinases, which also includes EGFR (ErbB1), Her3  
54 (ErbB3), and Her4 (ErbB4) [1]. The EGFR family of receptors is activated by ligand binding and  
55 subsequent dimerization, which leads to the activation of downstream pathways most often  
56 associated with mitogenic and pro-survival signaling. Some of the best-characterized of these  
57 signaling pathways include the PI3K/AKT/mTOR cascade, which promotes pro-survival signaling  
58 and protein synthesis, and the Ras/MAPK pathway that promotes cellular migration and cell cycle  
59 progression [2-4]. As such, this family of receptors is often the target of genetic alterations in  
60 cancers that result in their constitutive activation: e.g. *EGFR* is frequently mutated in lung cancers  
61 and amplified in gliomas, while *ERBB2* (Her2) is frequently amplified in breast cancers.

62 Clinical management of Her2+ breast cancers includes Her2-targeted monoclonal antibody (mAb)  
63 trastuzumab combined with chemotherapy, followed by, or lately in combination with, the newer  
64 generation of Her2-targeted mAb pertuzumab. These are followed by trastuzumab-emtansine, an  
65 antibody-drug conjugate, at later treatment stages, or small molecule inhibitors of EGFR/Her2,  
66 such as lapatinib. These Her2-targeted therapies have dramatically altered the outcomes for  
67 Her2+ breast cancer patients, especially in early disease. However, the metastatic Her2+ breast  
68 cancer is still an incurable disease, and all of these patients inevitably relapse on anti-Her2  
69 therapies [5]. Therefore, identifying the mechanisms of acquired resistance to anti-Her2 therapy,  
70 and developing novel therapeutic targeting strategies within the relapsed setting is a high priority  
71 goal.

72 The bulk of research effort in the acquired drug resistance field has focused on the alternative  
73 oncogenic bypass mechanisms and their potential targeting to prevent resistance. However,  
74 oncogenic hyperactivation, in addition to forcing cell growth and division, also triggers multiple  
75 homeostatic stress checkpoints such as DNA damage response, metabolic stress and proteotoxic  
76 stress, which could present opportunities for therapeutic exploitation [6, 7]. Although the traditional  
77 approach to cancer targeted therapy focused on inhibiting the driver oncogene, pharmacological  
78 forcing of irremediable oncogenic stress has been suggested as a viable alternative, especially in  
79 the cancers where oncogene-targeted therapy is not feasible (e.g. *MYC*-driven cancers) or where  
80 tumors have gained resistance to the oncogene-targeting agent [8-11]. We have previously shown  
81 that strong oncogenic signaling through Her2 amplification imposes a proteotoxic stress on the  
82 mammary epithelial cell that has to be mitigated by the activation of compensatory stress relief  
83 systems to allow for the tumor cell to survive [12]. Her2+ breast cancer cells are characterized by  
84 increased protein synthesis load due to chromosomal amplifications and hyperactive Her2/mTOR  
85 signaling, which creates dependence on the endoplasmic reticulum (ER)-associated degradation  
86 (ERAD) pathway to maintain protein homeostasis and prevent proteotoxic stress [12]. Thus,  
87 pharmacologic inhibition of ERAD through targeting of its central player, the p97 VCP ATPase,  
88 led to oncogenic Her2-dependent proteotoxic stress and cell death [12]. Although our study  
89 provided strong rationale for targeting of ERAD in Her2+ breast cancers, it is unknown how protein  
90 homeostasis and the associated dependencies change after prolonged anti-Her2 therapies. Since  
91 new treatment modalities, such as ERAD targeting, for Her2+ breast cancer patients are likely to  
92 enter the clinic in the heavily pre-treated patient populations, it is important that we understand  
93 the signaling and proteostasis dynamics during the process of cellular adaptation to anti-Her2  
94 therapy.

95 To address this goal, in this study, we developed a model of acquired resistance to anti-Her2  
96 therapy in Her2+ breast cancer cells by employing a frequently used strategy of *in vitro* dose  
97 escalation. In line with previous reports, we found that the resistance to Her2 inhibition is

98 associated with the compensatory overexpression of Her3 and the Her2-independent re-  
99 activation of downstream mitogenic pathways. However, acute Her2 inhibition leads to the  
100 metabolic and proteotoxic stress, and subsequent protein synthesis block due to PERK-mediated  
101 phosphorylation of the translation initiation factor eIF2 $\alpha$ . Interestingly, the compensatory  
102 overexpression of Her3 is unable to mitigate the ER stress due to Her2 inhibition, and therefore  
103 necessitates the overexpression of the protein phosphatase 1 subunit GADD34 (*PPP1R15A*) to  
104 relieve the ER stress-induced block to protein synthesis and promote Her2-independent cell  
105 proliferation. Strikingly, while GADD34-mediated uncoupling of ER stress from protein synthesis  
106 block allows for active cell growth under Her2 inhibition, it also imposes greater dependence on  
107 the ER quality control machinery to clear the proteotoxic aggregates and promote cell survival.  
108 Accordingly, Her2+ cells at the acquired resistance stage to Her2 inhibition are hypersensitive to  
109 the pharmacologic and genetic targeting of ERAD due to unresolved ER stress and proteotoxic  
110 load. Our studies provide strong rationale for the consideration of ERAD-targeted therapies in  
111 Her2+ breast cancer patients who have progressed on prior Her2-targeted therapies. More  
112 generally, this study also supports the notion of identifying and targeting the secondary  
113 vulnerabilities (i.e. collateral sensitivities) imposed by the drug resistant state in cancers [13-16].

## 114 **Materials and Methods**

### 115 *Cell culture*

116 Human HER2+ breast cancer SKBR3 cells were cultured in RPMI 1640 (Gibco) containing 10%  
117 fetal bovine serum with 0.1% antibiotic and antimycotic (Gibco). Human mammary epithelial  
118 MCF10A cells were cultured in Dulbecco's modified Eagle's medium/F12 containing 10% horse  
119 serum with 0.1% antibiotic and antimycotic (Gibco), hydrocortisone, cholera toxin, insulin (all from  
120 Sigma) and EGF (PeproTech Inc.). For drug treatments, cells were incubated with lapatinib was  
121 from (Selleck Chemicals, S1028), 250nM CB-5083 (Cayman Chemicals, 19311), and 15 $\mu$ M  
122 guanabenz (Tocris, 0885).

### 123 *Lapatinib drug treatment*

124 Lapatinib-resistant cell lines were generated by chronic exposure of 250nM lapatinib. Media was  
125 refreshed every two days with fresh lapatinib. Every two months, lapatinib concentration was  
126 increased from 250nm to 500nM, followed by 500nM to 1 $\mu$ M, then the cells were maintained in  
127 1 $\mu$ M lapatinib. Viability analyses (growth rates) and western blotting assays were performed every  
128 two months before increasing the concentration of lapatinib. Lapatinib resistance was confirmed  
129 by inhibition of phosphorylation of HER2 expression in western blot.

### 130 *Lentiviral constructs and transfections*

131 HER2 and HER3 expression plasmids were purchased from Addgene. The shVCP  
132 (TRC0000004249) and shHER3 (TRCN0000218392) pLKO.1 constructs were from the Mission  
133 shRNA collection from Sigma-Aldrich. Lentivirus particles expressing shRNA against the gene of  
134 interest were generated by co-transfection with the VSV-G packaging and CDNL envelope  
135 plasmids (courtesy of Biplab Dasgupta, Cincinnati Children's Hospital Medical Center, Cincinnati,  
136 OH) into HEK-293T cells using jetPRIME transfection reagent. Lentiviral supernatant was  
137 collected every 24 hours after transfection for 3 days. Cells were infected with lentiviral  
138 supernatant in the presence of polybrene (Sigma). shHER3 cells were selected in puromycin  
139 before analysis.

### 140 *Western Blotting*

141 Total cellular proteins were extracted using RIPA buffer, separated on an SDS-PAGE gel, and  
142 electrophoretically transferred onto PVDF membrane. The membranes were blocked in 5% dry  
143 milk in tris-buffered saline-Tween 20 for 1 hour. Blocked membrane were probed with primary  
144 antibodies (1:1000) overnight (Supplementary table 1) in 5% bovine serum albumin. B-actin was  
145 used as a loading control. Membranes were incubated with secondary antibody (1:5000) and  
146 visualized using a gel imager (Azure Biosystems).

#### 147 *Cell viability analyses*

148 Equal number of cells were seeded into 96 –well culture plates and incubated overnight then  
149 treated with drugs or lentivirus as indicated. After 72 hours, dead cells were removed from the  
150 plates by washing with PBS buffer and the attached cells were stained and fixed with crystal violet  
151 (sigma) for 30 min at room temperature. After 30 min, excess stains was removed with tap water  
152 and the plates were dried at room temperature. Once dried, crystal violet crystals were re-  
153 dissolved in triton (Amresco), and cell density was determined by measuring the absorbance at  
154 570nm in a microplate reader (Bio-tek Instruments).

#### 155 *Glucose uptake kit*

156 The glucose uptake colorimetric assay kit (K676-100, Biovision, CA) was used according to the  
157 manufacturer's instructions. Briefly,  $10^4$  cells were seeded into a 96-well plate overnight. Cells  
158 were washed twice with PBS and starved in 100ul of serum free medium for 2 hours (to increase  
159 glucose uptake), then rewashed three times with PBS. The cells were starved or not starved for  
160 glucose by preincubating with 100  $\mu$ L Krebs Ringer Phosphate HEPES (KRPH) buffer containing  
161 2% BSA for 40 min. Cells were stimulated with or without insulin (1  $\mu$ M) for 20 min to activate  
162 glucose transporter, and 10  $\mu$ L of 10 mM 2-deoxyglucose (2-DG) was added and incubated for  
163 20 min. The glucose uptake was measured by the cellular fluorescence (Ex/Em = 535/587 nm) in  
164 a microplate reader (BioTake, USA)

#### 165 *Click it (Protein synthesis assay)*

166 Newly synthesized proteins were detected and measured with the click-it HPG kit (C10428  
167 Thermo fisher Scientific; C10428) according to the manufacturer's instructions. Briefly, equal  
168 number of cells (50,000) were seeded on coverslips (for microscopy) and in 6 well plates (for flow  
169 cytometry) overnight. Media was removed and 250  $\mu$ L of 50uM of click-it HPG solution were added  
170 per well. Cells were incubated in 5% CO<sub>2</sub> humidified incubator for 30 minutes then cells were  
171 washed with PBS. For flow cytometry analysis, cells were trypsinized pelleted. For microscopy,  
172 cells remained on coverslips and were fixed with 4% formaldehyde at room temperature for 30  
173 minutes then permeabilized with methanol for 1 hour at room temperature. All samples were then  
174 washed twice with PBS then 500  $\mu$ L of click-iT reaction cocktail was added and incubated for 30  
175 minutes in dark. Excess staining solution was removed and cells were washed with click-iT  
176 reaction rinse buffer. Finally, coverslips were mounted and analyzed using a Nikon A1R  
177 microscope wavelength or resuspended in PBS for flow cytometry analysis with a FACS Aria (BD  
178 Biosciences).

#### 179 *Metabolomics*

180 Cell extraction: The cell pellets were resuspended in 1.5mL ice-cold 80% methanol, vortex for 1  
181 min and incubated on ice for 10min. The samples were centrifuged at 10,000x  $g_n$  for 10 min at  
182 4°C. The supernatant, i.e. the polar extract, was dried in a SpeedVac centrifuge for 4-6 h and  
183 stored at -20°C until further preparation for NMR data collection. On the day of the data collection,  
184 the dried hydrophilic cell extract samples are resuspended in 220  $\mu$ L of NMR buffer (100 mM

185 potassium phosphate (pH 7.3), 0.1% sodium azide, 1mM trimethylsilylpropionate (TSP) in 100%  
186 D<sub>2</sub>O). The protein pellets were rinsed with 0.5 mL 80% methanol, centrifuged for 20min at 10,000x  
187  $g_n$  and dried in SpeedVac centrifuge for 1 h before stored in -80C freezer.

188 Media sample processing: On the day of the data collection, samples were thawed on ice and  
189 centrifuged 4000x  $g_n$  for 5 min at 4 °C. The 550  $\mu$ L supernatant of media samples were aliquoted  
190 onto pre-washed 3 kDa spin filters (NANOSEP 3K, Pall Life Sciences), and centrifuged 10000x  
191  $g_n$  for 90 min at 4 °C. The 500  $\mu$ L of plasma filtrate was mixed with NMR buffer up to 600  $\mu$ L.

192 NMR Spectroscopy acquisition and processing: The experiments are conducted using 200  $\mu$ L cell  
193 and 550  $\mu$ L media samples in 103.5 mm x 3 mm and 103.5 mm x 5 mm NMR tubes (Bruker). All  
194 the data collection and processing were performed using Topspin 3.6 software (Bruker Analytik,  
195 Rheinstetten, Germany). One-dimensional <sup>1</sup>H NMR spectra are acquired on a Bruker Avance II  
196 600 MHz spectrometer using Prodigy BBO cryoprobe at 298 K using the noesygppr1d pulse  
197 sequence (Ref1). For a representative sample, two dimensional data <sup>1</sup>H-<sup>1</sup>H total correlation  
198 spectroscopy (TOCSY, mlevphpr.2) and 2D <sup>1</sup>H-<sup>13</sup>C heteronuclear single quantum coherence  
199 (HSQC, hsqcedetgpsisp2.2) were collected for metabolites assignment.

200 Metabolites assignments and quantification: Metabolites found in cell extract are assigned based  
201 on 1D <sup>1</sup>H and 2D NMR experiments. Peaks are assigned by comparing the chemical shifts and  
202 spin-spin couplings with reference spectra found in databases, such as the Human Metabolome  
203 Database (HMDB) (Ref2), and Chenomx® NMR Suite profiling software (Chenomx Inc. version  
204 8.1). The concentrations of the metabolites are calculated using Chenomx software based on the  
205 internal standard, TMSP.

206

## 207 **Results**

208 To study the kinetics of proteostatic perturbations during the cellular adaptation to chronic Her2  
209 inhibition, we followed a frequently employed *in vitro* approach to the modeling of acquired  
210 resistance by prolonged incubation of Her2-amplified SKBR3 breast cancer cells in increasing  
211 doses of lapatinib (Fig.1A). After an initial period of drug-induced cytotoxicity, cells reach stasis  
212 (resistance phase) after 2 weeks of drug exposure, and start active growth in drug after about 2  
213 months (relapse phase), at which point we repeated the cycle with a higher drug dose, until cells  
214 were actively growing in 1 $\mu$ M lapatinib (Fig.1A-B). As expected, resistance and relapse on  
215 lapatinib were associated with the activation of the Akt, MAP and mTOR kinases during chronic  
216 lapatinib treatment (Fig.1C).

217 RNAseq-based transcriptomic profiling of cells at each stage of tumor cell growth under 1 $\mu$ M  
218 lapatinib, followed by gene set enrichment analysis of corresponding signatures, revealed that  
219 the resistance and relapse phases display a signature consistent with the activation of neuregulin  
220 (NRG1) and EGF signaling (Fig.1D-E). Neuregulin is a ligand for Her3 receptor tyrosine kinase,  
221 which dimerizes with Her2 to promote mitogenic signaling, and whose overexpression mediates  
222 acquired resistance to Her2 inhibition [17-20]. Accordingly, total and phosphorylated forms of  
223 Her3 levels were dramatically induced shortly after lapatinib treatment (Fig.2A). Consistent with  
224 its central role in the acquired resistance to Her2 inhibition, the activation of the downstream  
225 pathways, and hence survival under lapatinib, were strongly dependent on Her3 (Fig.2B-D).  
226 Accordingly, while the knock-down of Her3 prevented, its overexpression facilitated, the acquired  
227 resistance to lapatinib (Fig.2E), confirming the previously established role of Her3 as a substitute  
228 oncogenic kinase for Her2. Interestingly, this oncogene switch was highly dynamic, as release of  
229 cells from lapatinib at the relapse phase (drug release phase: 48 hours in drug-free media)

230 restored total and phosphorylated Her2 levels and reversed the upregulation of phospho-, but not  
231 total, levels of Her3 in a few days, and reversed most of the gene expression changes associated  
232 with chronic lapatinib treatment, with little effect on the downstream signaling pathways (Figs. 1C,  
233 2A-C).

234 We previously showed that the survival of Her2+ breast cancer cells is critically dependent on  
235 balancing the cell's protein folding capacity with its protein synthesis load [12]. To study how  
236 cellular protein homeostasis is modulated during chronic Her2 inhibition, we measured the protein  
237 synthesis rates during each phase of drug inhibition. Not surprisingly, protein synthesis rates  
238 closely followed cell growth kinetics, with a dramatic acute inhibition of protein synthesis in the  
239 initial phase, followed by stasis in the resistance, and complete recovery in the relapse phase  
240 (Fig.3A-B). The recovery of protein synthesis during the relapse phase was dependent on Her3,  
241 but this dependence on Her3 diminished shortly after release from lapatinib (Fig.3C). As we  
242 showed previously, Her2 inhibition in the acute phase resulted in ER stress characterized by  
243 phosphorylation of PERK, and of its target eIF2- $\alpha$  on Ser51, a hallmark of ER stress-induced  
244 inhibition of protein synthesis (Fig.3D). Interestingly, activation of Her3 and of downstream  
245 signaling pathways in the resistance phase did not alleviate, but further exacerbate, the ER stress  
246 phenotype (Fig.3D), suggesting that Her3 activation is unable to suppress the ER stress  
247 phenotype induced by Her2 inhibition. However intriguingly, the relapse phase and the recovery  
248 of Her3-mediated protein synthesis and growth was characterized by the alleviation of eIF2  
249 inhibitory phosphorylation on Ser51, despite the strong persistence of high levels of  
250 phosphorylated PERK (Fig.3D), indicating an uncoupling of PERK from eIF2 phosphorylation.  
251 Interestingly, the drug release phase was characterized by an even higher protein synthesis load  
252 (Fig.3A), indicating a surge in the protein synthesis rates caused by Her2 de-inhibition. Moreover,  
253 despite Her2 re-activation, the increased XBP1s and reduced p-eIF2 levels persisted at the drug  
254 release stage (Fig.3D).

255 Next, we sought to gain insight into the mechanisms of ER stress during the different phases of  
256 Her2 inhibition. We and others have reported that acute Her2 inhibition impairs glucose uptake,  
257 which contributes to ER stress [21]. To analyze the dynamics of metabolic pathway activity  
258 changes during the acute and chronic drug response in Her2+ cells, we performed NMR-based  
259 intracellular (Fig.4A) and extracellular (Supp.Fig.3) metabolomics profiling of cells at each phase  
260 of the drug response cycle. As expected, the remission phase was characterized by the increases  
261 in glucose and amino acid levels intracellularly (see Fig.4A), consistent with their reduced  
262 breakdown, as well as extracellularly (see Supp.Fig.3), consistent with the drop in their cellular  
263 uptake. In addition, there was a significant reduction in the intracellular (Fig.4A) and extracellular  
264 lactate levels (Supp.Fig.3), along with a drop in ATP and an increase in ADP levels, consistent  
265 with a global reduction in glycolysis and energy metabolism. Significant increases in the  
266 intracellular and extracellular amino acid pools, in turn, is consistent with the global reduction in  
267 the protein synthesis (see Fig.3), leading to reduced uptake and utilization of amino acids in  
268 protein synthesis.

269 Interestingly, the resistance and the relapse phases had highly similar profiles to each other, with  
270 significant increase in ATP generation and intracellular glucose, and a decrease in the lactate and  
271 amino acid levels, as well as in the citric acid (TCA) cycle intermediates such as citrate, succinate  
272 and fumarate. These observations suggest that, despite resumption of ATP generation at an even  
273 higher rate compared to the basal state of these cells (see Fig.4A), and resumption of protein  
274 synthesis (i.e. consumption of intracellular amino acid pools), flux through glycolysis remains low.  
275 However, there may be a switch towards the increased utilization of TCA cycle and mitochondrial  
276 oxidative phosphorylation for ATP generation as the cells reprogram their metabolism during

277 adaptation to chronic Her2 inhibition (Fig.4B), similar to what has been reported previously in  
278 other contexts of acquired drug resistance [22-26].

279 The inhibition of glucose uptake during acute and chronic Her2 inhibition was accompanied by  
280 reduced flux through the nucleotide and amino-sugar pathway, as evidenced by reduced levels  
281 of UDP-glucose (see Fig.4A) and O-linked acetyl-glucosamine, despite their slight restoration at  
282 the relapse stage (Fig.4C). These observations suggest that the compensatory activation of Her3,  
283 while sufficient to reactivate the downstream signaling pathways and protein synthesis, is not  
284 sufficient to rescue the metabolic defects of Her2 inhibition, which probably culminates in ER  
285 stress. Accordingly, the overexpression of Her3 was not able to restore glucose uptake defects in  
286 lapatinib-treated SKBR3 cells (Fig.4D), and was less efficient in triggering glucose uptake in non-  
287 transformed mammary epithelial cells (MCF10A) compared to Her2, despite being equally  
288 capable of activating the downstream Akt phosphorylation (Fig.4E-F). Interestingly, release of  
289 cells from lapatinib at the relapse stage leads to the partial resumption of glycolysis (evidenced  
290 by lactate production) and a partial shut-down of TCA (evidenced by increased citrate and  
291 reduced ATP). The levels of free amino acids are even further reduced, consistent with a surge  
292 in the protein synthesis rates upon de-inhibition of Her2 (see Fig.4A). These observations suggest  
293 that while Her3 activation during chronic Her2 inhibition is able to restore mitogenic signaling, it  
294 is not able to sustain a glycolytic phenotype in the absence of Her2, forcing cells to utilize  
295 mitochondrial OXPHOS.

296 To identify the factors that mediate tumor cell growth during glucose starvation and subsequent  
297 ER stress under chronic lapatinib treatment, we analyzed the genes that were specifically  
298 overexpressed (z-score of > 1) in the relapse, but not any other, condition. Interestingly, applying  
299 this filter only revealed several genes, one of which was *PPP1R15A*, a gene that encodes the  
300 GADD34 subunit of the protein phosphatase 1 (PP1) (Supp.Fig.1). Importantly, one of the best-  
301 characterized functions of GADD34 is to mediate the dephosphorylation of Ser51 on eIF2 $\alpha$  by  
302 PP1, reversing PERK-mediated phosphorylation and inhibition of eIF2 $\alpha$  activity [27].

303 Phosphorylation of eIF2 $\alpha$  on Ser51 by PERK is an essential step to inhibit protein synthesis during  
304 ER stress to prevent the accumulation of misfolded proteins [28, 29]. Recovery of protein  
305 synthesis and cell growth during the resistance phase of chronic Her2 inhibition is accompanied  
306 by the loss of Ser51 phosphorylated eIF2 $\alpha$  despite the persistence of active ER stress response  
307 and active PERK (see Fig.3D). GADD34 is one of the PP1 subunits that mediate eIF2 $\alpha$   
308 dephosphorylation, and is known to be responsive to ER stress [27, 30]. Indeed, GADD34  
309 expression is dramatically induced at both mRNA and protein levels starting in the resistance  
310 phase and reaching peak levels during the relapse and drug release phases, where eIF2 $\alpha$   
311 dephosphorylation takes place (Fig.5A). Importantly, inhibiting GADD34 by treatment with  
312 guanabenz, a specific inhibitor of GADD34 [31], or by GADD34-targeting shRNA restored eIF2 $\alpha$   
313 phosphorylation, protein synthesis block and growth inhibition at the relapse-stage cells (Fig.5B-  
314 G), suggesting that GADD34 overexpression during the resistance and relapse phases allows  
315 cells to uncouple the metabolic ER stress response from protein synthesis to permit active growth  
316 (Fig.5H).

317 To test if *PPP1R15A*/GADD34 expression correlates with anti-Her2 therapy response in human  
318 patients, we analyzed the transcriptomic data from the Long-HER study, which obtained whole-  
319 genome gene expression measurements in advanced Her2+ breast cancer patients who had long  
320 (>3 years) durable response to first-line trastuzumab therapy, relative to the group who had a  
321 poor response (<1 year response) [32]. Importantly, in this cohort, high expression of *PPP1R15A*  
322 significantly correlated with the shorter duration of response (Fig.5I), strongly suggesting a role  
323 for the GADD34 – eIF2 axis in the resistance to anti-Her2 therapy in the clinic.



324 We have shown that increased proteotoxic load in Her2+ breast cancer cells creates a  
325 dependency on the ER-associated degradation (ERAD) pathway to prevent cytotoxic ER stress  
326 [12]. We asked if the proteotoxic state induced by the oncogenic switch from Her2 to Her3 during  
327 chronic Her2 inhibition and later drug release creates a similar, or more pronounced, dependence  
328 on ERAD for survival. Intriguingly, ablation of expression of Valosin-containing Protein (VCP), the  
329 core ATPase of the VCP/UFD1L/NPL complex responsible for the extraction and the delivery of  
330 the misfolded proteins to the proteasome [33], has significantly higher toxicity to cells in the  
331 relapse phase, and even higher toxicity at the drug release phase (Fig.6A-C). This was  
332 accompanied by significant accumulation of poly-ubiquitinated proteins in these phases of drug  
333 response, indicating a heightened proteotoxic state. The use of a recently developed specific VCP  
334 inhibitor [34] resulted in a similar phenotype (Fig.6D-E), especially more evident at a higher dose,  
335 suggesting that the vulnerability of the relapse and drug release phases of chronic Her2 inhibition  
336 is pharmacologically exploitable.

337 In order to test if the mechanisms of resistance to Her2-targeted therapy and the molecular  
338 vulnerabilities thereof presented above are applicable to other models, we carried out a similar  
339 approach using another Her2+ breast cancer cell line model, BT474. Interestingly, continuous  
340 incubation of BT474 cells in increasing doses of lapatinib allowed them to actively grow in 400nM  
341 of the drug (Supp.Fig.2A), associated with concomitant activation of Her3 and the downstream  
342 pathways (Supp.Fig.2B). In addition, similar to the SKBR3 model, active growth in lapatinib in  
343 BT474 cells was associated with the ER stress, a dramatic increase in GADD34 levels, and the  
344 corresponding decrease in eIF2 phosphorylation (Supp.Fig.2C). While acute lapatinib treatment  
345 was associated with decreased protein synthesis, the relapse phase was associated with a  
346 significantly increased protein synthesis, which was reversible with guanabenz treatment  
347 (Supp.Fig.2D). Finally, cells at the relapse phase were more sensitive to the VCP inhibitor CB-  
348 5083 (Supp.Fig.2E). The results from our orthogonal BT474 model, therefore, support the notion  
349 that the GADD34-eIF2 axis plays an important role in Her3-mediated growth during chronic Her2  
350 inhibition, and that the resulting imbalance in the ER proteotoxic load sensitizes cells to the  
351 inhibitors of the ER protein clearance pathways.

## 352 **Discussion**

353 Targeted inhibition of oncogenic kinases is a promising therapeutic option in several molecularly  
354 defined contexts, and mAb-based targeting of the Her2 oncogene in breast cancers has  
355 dramatically changed the outcome of this subclass of the disease. However, *de novo* and  
356 acquired resistance to kinase inhibitors is a major barrier to therapeutic success, especially in the  
357 advanced setting [5]. Transcriptional and post-transcriptional overexpression of the pseudo-  
358 kinase Her3 and subsequent hetero-dimerization with Her2 has been consistently shown as a  
359 major mediator of acquired resistance to Her2 inhibition, driving Her2-independent activation of  
360 the downstream mitogenic pathways [17-20]. Several other mechanisms, most involving  
361 alternative receptor tyrosine kinases, have been proposed as mechanisms of acquired resistance  
362 to Her2 inhibition in different cell models [35], underscoring the multitude of “bypass” options [36]  
363 that are available for the tumor cell to evade therapy. Indeed, widespread “adaptive kinome  
364 reprogramming” in response to chronic Her2 inhibition has been reported to upregulate a variety  
365 of compensatory receptor tyrosine kinases, each with the demonstrated ability to independently  
366 activate the downstream oncogenic pathways (mainly PI3K/mTOR) and tumor growth [37].  
367 Unfortunately, clinical trials for combination treatments with Her2 and mTOR pathways in  
368 advanced Her2+ breast cancers, despite evidence for prolonged progression-free survival [38,  
369 39], have not yielded changes to the standard treatment due to significant toxicity associated with  
370 the combination [5], underscoring the need for alternative targeting strategies.

371 A relatively understudied concept in the field is exploiting the therapeutically targetable  
372 vulnerabilities imposed on the cell by oncogenic activation, or oncogenic stress. The central  
373 theme in this concept is that the functional state of the tumor cell gained through evolutionary  
374 adaptation to the oncogenic burden or chronic drug treatment is highly fragile and can be targeted  
375 by identifying these vulnerability points. These so-called non-oncogene addictions [6] or collateral  
376 sensitivities [40] in cancer cells have been shown to be viable therapeutic strategies for the killing  
377 of tumor cells with non-targetable oncogenes (e.g. *MYC*) [10] or those that have gained resistance  
378 to targeted therapy [13, 40]. For example, *MYC*- and *KRAS*-driven cancers have been reported  
379 to be particularly sensitive to the inhibitors of the key players of lipid and glucose metabolism due  
380 to the oncogenic reprogramming of the cellular metabolic pathways [41-45]. Similarly, the  
381 proteostatic imbalance created by oncogenic transformation has also been shown to create  
382 vulnerabilities within the adaptive proteotoxic stress response pathways, presenting further  
383 opportunities for therapeutic exploitation [11, 46].

384 Along this line, we previously reported that Her2+ breast cancer cells have an acute dependence  
385 on the ER-associated degradation pathway for survival, due to the severe proteotoxic stress  
386 imposed by the genomic amplification and hyper-active signaling by the Her2 oncogene [12]. In  
387 the present study, we asked if a similar dependency exists in Her2+ breast cancer cells within the  
388 context of acquired resistance to Her2 inhibition, as this is the most likely clinical context where  
389 ERAD-targeted therapy might be considered in this group of patients. Moreover, it is not clear  
390 how the signaling and protein homeostasis dynamics change during the course of chronic anti-  
391 Her2 therapy, and what alternative vulnerabilities might be imposed by the very mechanisms that  
392 confer resistance to Her2 inhibition.

393 Our study using the *in vitro* drug dosing approach of acquired resistance to Her2 inhibition  
394 reproduces the central role of Her3 in taking over the mitogenic signaling in Her2+ breast cancer  
395 cells (Fig.1-2). However, intriguingly, the overexpression of Her3 is unable to compensate for the  
396 glucose uptake and ER proteostasis defects of chronic Her2 inhibition (Figs.3-4), thus resulting in  
397 major metabolic remodeling in the resistant cells (Fig.4). The uncoupling of the ER stress  
398 response from the regulation of protein synthesis is accomplished by the dramatic overexpression  
399 of GADD34, a subunit of PP1 complex, which mediates the dephosphorylation of the Ser51 on  
400 eIF2 $\alpha$ , allowing cells to resume protein synthesis and growth despite the active ER stress  
401 response (Fig.5). Intriguingly, active protein synthesis and cell growth under such unresolved ER  
402 stress further strains the protein homeostasis machinery, creating a hyper-dependence on the ER  
403 quality control system, which includes ERAD, to mitigate the proteotoxic imbalance and sustained  
404 viability (Fig.6). It is important to note that the high expression of GADD34 correlates with a shorter  
405 duration of response to anti-Her2 therapy in breast cancer patients in the clinic (Fig.5H),  
406 suggesting that our findings from our *in vitro* model reveal clinically relevant mechanisms, and  
407 that targeting of the ER quality control system might be a viable therapeutic option post-  
408 progression on Her2 inhibitors.

#### 409 **Acknowledgements**

410 This work was supported by NIH awards R01CA193549 (KK and LMPV), R37CA218072 (LMPV),  
411 and a Department of Defense Breast Cancer Research Program level I award W81XWH-16-1-  
412 0028 (NS). We would like to acknowledge the assistance of the Research Flow Cytometry Core  
413 in the Division of Rheumatology and the NMR-based Metabolomics Core Facility at Cincinnati  
414 Children's Hospital Medical Center.

#### 415 **Conflicts of Interest**

416 KK is currently an employee of Champions Oncology Inc.

417

## 418 References

- 419 1. Olayioye, M.A., et al., *The ErbB signaling network: receptor heterodimerization in development*  
420 *and cancer*. EMBO J, 2000. **19**(13): p. 3159-67.
- 421 2. Hare, S.H. and A.J. Harvey, *mTOR function and therapeutic targeting in breast cancer*. Am J Cancer  
422 Res, 2017. **7**(3): p. 383-404.
- 423 3. Galang, C.K., et al., *Oncogenic Neu/ErbB-2 increases ets, AP-1, and NF-kappaB-dependent gene*  
424 *expression, and inhibiting ets activation blocks Neu-mediated cellular transformation*. J Biol Chem,  
425 1996. **271**(14): p. 7992-8.
- 426 4. Laughner, E., et al., *HER2 (neu) signaling increases the rate of hypoxia-inducible factor 1alpha (HIF-*  
427 *1alpha) synthesis: novel mechanism for HIF-1-mediated vascular endothelial growth factor*  
428 *expression*. Mol Cell Biol, 2001. **21**(12): p. 3995-4004.
- 429 5. Hurvitz, S.A., K.A. Gelmon, and S.M. Tolaney, *Optimal Management of Early and Advanced HER2*  
430 *Breast Cancer*. Am Soc Clin Oncol Educ Book, 2017. **37**: p. 76-92.
- 431 6. Solimini, N.L., J. Luo, and S.J. Elledge, *Non-oncogene addiction and the stress phenotype of cancer*  
432 *cells*. Cell, 2007. **130**(6): p. 986-8.
- 433 7. Luo, J., N.L. Solimini, and S.J. Elledge, *Principles of cancer therapy: oncogene and non-oncogene*  
434 *addiction*. Cell, 2009. **136**(5): p. 823-37.
- 435 8. Nagel, R., E.A. Semenova, and A. Berns, *Drugging the addict: non-oncogene addiction as a target*  
436 *for cancer therapy*. EMBO Rep, 2016. **17**(11): p. 1516-1531.
- 437 9. Nguyen, H.G., et al., *Development of a stress response therapy targeting aggressive prostate*  
438 *cancer*. Sci Transl Med, 2018. **10**(439).
- 439 10. Li, B. and M.C. Simon, *Molecular Pathways: Targeting MYC-induced metabolic reprogramming*  
440 *and oncogenic stress in cancer*. Clin Cancer Res, 2013. **19**(21): p. 5835-41.
- 441 11. Young, R.M., et al., *Dysregulated mTORC1 renders cells critically dependent on desaturated lipids*  
442 *for survival under tumor-like stress*. Genes Dev, 2013. **27**(10): p. 1115-31.
- 443 12. Singh, N., R. Joshi, and K. Komurov, *HER2-mTOR signaling-driven breast cancer cells require ER-*  
444 *associated degradation to survive*. Sci Signal, 2015. **8**(378): p. ra52.
- 445 13. Acar, A., et al., *Exploiting evolutionary steering to induce collateral drug sensitivity in cancer*. Nat  
446 Commun, 2020. **11**(1): p. 1923.
- 447 14. Dhawan, A., et al., *Collateral sensitivity networks reveal evolutionary instability and novel*  
448 *treatment strategies in ALK mutated non-small cell lung cancer*. Sci Rep, 2017. **7**(1): p. 1232.
- 449 15. Scarborough, J.A., et al., *Identifying States of Collateral Sensitivity during the Evolution of*  
450 *Therapeutic Resistance in Ewing's Sarcoma*. iScience, 2020. **23**(7): p. 101293.
- 451 16. Hall, M.D., M.D. Handley, and M.M. Gottesman, *Is resistance useless? Multidrug resistance and*  
452 *collateral sensitivity*. Trends Pharmacol Sci, 2009. **30**(10): p. 546-56.
- 453 17. Claus, J., et al., *Inhibitor-induced HER2-HER3 heterodimerisation promotes proliferation through a*  
454 *novel dimer interface*. Elife, 2018. **7**.
- 455 18. Claus, J., et al., *A role for the pseudokinase HER3 in the acquired resistance against EGFR- and*  
456 *HER2-directed targeted therapy*. Biochem Soc Trans, 2014. **42**(4): p. 831-6.
- 457 19. Xia, W., et al., *An heregulin-EGFR-HER3 autocrine signaling axis can mediate acquired lapatinib*  
458 *resistance in HER2+ breast cancer models*. Breast Cancer Res, 2013. **15**(5): p. R85.

- 459 20. Garrett, J.T., et al., *Transcriptional and posttranslational up-regulation of HER3 (ErbB3)*  
460 *compensates for inhibition of the HER2 tyrosine kinase*. Proc Natl Acad Sci U S A, 2011. **108**(12): p.  
461 5021-6.
- 462 21. Komurov, K., et al., *The glucose-deprivation network counteracts lapatinib-induced toxicity in*  
463 *resistant ErbB2-positive breast cancer cells*. Mol Syst Biol, 2012. **8**: p. 596.
- 464 22. Viale, A., et al., *Oncogene ablation-resistant pancreatic cancer cells depend on mitochondrial*  
465 *function*. Nature, 2014. **514**(7524): p. 628-32.
- 466 23. Sun, Y., et al., *Metabolic and transcriptional profiling reveals pyruvate dehydrogenase kinase 4 as*  
467 *a mediator of epithelial-mesenchymal transition and drug resistance in tumor cells*. Cancer Metab,  
468 2014. **2**(1): p. 20.
- 469 24. Hirpara, J., et al., *Metabolic reprogramming of oncogene-addicted cancer cells to OXPHOS as a*  
470 *mechanism of drug resistance*. Redox Biol, 2019. **25**: p. 101076.
- 471 25. Ippolito, L., et al., *Metabolic shift toward oxidative phosphorylation in docetaxel resistant prostate*  
472 *cancer cells*. Oncotarget, 2016. **7**(38): p. 61890-61904.
- 473 26. Zhang, L., et al., *Metabolic reprogramming toward oxidative phosphorylation identifies a*  
474 *therapeutic target for mantle cell lymphoma*. Sci Transl Med, 2019. **11**(491).
- 475 27. Novoa, I., et al., *Feedback inhibition of the unfolded protein response by GADD34-mediated*  
476 *dephosphorylation of eIF2alpha*. J Cell Biol, 2001. **153**(5): p. 1011-22.
- 477 28. Harding, H.P., et al., *Perk is essential for translational regulation and cell survival during the*  
478 *unfolded protein response*. Mol Cell, 2000. **5**(5): p. 897-904.
- 479 29. Harding, H.P., Y. Zhang, and D. Ron, *Protein translation and folding are coupled by an endoplasmic-*  
480 *reticulum-resident kinase*. Nature, 1999. **397**(6716): p. 271-4.
- 481 30. Novoa, I., et al., *Stress-induced gene expression requires programmed recovery from translational*  
482 *repression*. EMBO J, 2003. **22**(5): p. 1180-7.
- 483 31. Tsaytler, P., et al., *Selective inhibition of a regulatory subunit of protein phosphatase 1 restores*  
484 *proteostasis*. Science, 2011. **332**(6025): p. 91-4.
- 485 32. Gamez-Pozo, A., et al., *The Long-HER study: clinical and molecular analysis of patients with HER2+*  
486 *advanced breast cancer who become long-term survivors with trastuzumab-based therapy*. PLoS  
487 One, 2014. **9**(10): p. e109611.
- 488 33. Meyer, H., M. Bug, and S. Bremer, *Emerging functions of the VCP/p97 AAA-ATPase in the ubiquitin*  
489 *system*. Nat Cell Biol, 2012. **14**(2): p. 117-23.
- 490 34. Anderson, D.J., et al., *Targeting the AAA ATPase p97 as an Approach to Treat Cancer through*  
491 *Disruption of Protein Homeostasis*. Cancer Cell, 2015. **28**(5): p. 653-665.
- 492 35. Rexer, B.N. and C.L. Arteaga, *Intrinsic and acquired resistance to HER2-targeted therapies in HER2*  
493 *gene-amplified breast cancer: mechanisms and clinical implications*. Crit Rev Oncog, 2012. **17**(1):  
494 p. 1-16.
- 495 36. Lovly, C.M. and A.T. Shaw, *Molecular pathways: resistance to kinase inhibitors and implications*  
496 *for therapeutic strategies*. Clin Cancer Res, 2014. **20**(9): p. 2249-56.
- 497 37. Stuhlmiller, T.J., et al., *Inhibition of Lapatinib-Induced Kinome Reprogramming in ERBB2-Positive*  
498 *Breast Cancer by Targeting BET Family Bromodomains*. Cell Rep, 2015. **11**(3): p. 390-404.
- 499 38. Andre, F., et al., *Everolimus for women with trastuzumab-resistant, HER2-positive, advanced*  
500 *breast cancer (BOLERO-3): a randomised, double-blind, placebo-controlled phase 3 trial*. Lancet  
501 Oncol, 2014. **15**(6): p. 580-91.
- 502 39. Hurvitz, S.A., et al., *Combination of everolimus with trastuzumab plus paclitaxel as first-line*  
503 *treatment for patients with HER2-positive advanced breast cancer (BOLERO-1): a phase 3,*  
504 *randomised, double-blind, multicentre trial*. Lancet Oncol, 2015. **16**(7): p. 816-29.
- 505 40. Pluchino, K.M., et al., *Collateral sensitivity as a strategy against cancer multidrug resistance*. Drug  
506 Resist Updat, 2012. **15**(1-2): p. 98-105.

- 507 41. Carroll, P.A., et al., *Deregulated Myc requires MondoA/Mlx for metabolic reprogramming and*  
508 *tumorigenesis*. *Cancer Cell*, 2015. **27**(2): p. 271-85.
- 509 42. Yoshida, G.J., *Beyond the Warburg Effect: N-Myc Contributes to Metabolic Reprogramming in*  
510 *Cancer Cells*. *Front Oncol*, 2020. **10**: p. 791.
- 511 43. Patra, K.C., et al., *Hexokinase 2 is required for tumor initiation and maintenance and its systemic*  
512 *deletion is therapeutic in mouse models of cancer*. *Cancer Cell*, 2013. **24**(2): p. 213-228.
- 513 44. Pupo, E., et al., *KRAS-Driven Metabolic Rewiring Reveals Novel Actionable Targets in Cancer*. *Front*  
514 *Oncol*, 2019. **9**: p. 848.
- 515 45. Hu, K., et al., *Suppression of the SLC7A11/glutathione axis causes synthetic lethality in KRAS-*  
516 *mutant lung adenocarcinoma*. *J Clin Invest*, 2020. **130**(4): p. 1752-1766.
- 517 46. Yang, H., et al., *HSP90/AXL/eIF4E-regulated unfolded protein response as an acquired vulnerability*  
518 *in drug-resistant KRAS-mutant lung cancer*. *Oncogenesis*, 2019. **8**(9): p. 45.

519

520

## 521 Figure legends

522 **Figure 1.** Developing a model of acquired resistance to anti-Her2 therapy *in vitro*. A) SKBR3  
523 breast cancer cells were cultured in lapatinib till they gained resistance and started active growth  
524 under drug (typically ~ 2 months), when the lapatinib concentration was increased as shown. B)  
525 Growth rate (difference in relative viability between days 1 and 3 of seeding divided by 2, see  
526 Methods) at the various stages of chronic lapatinib treatment. C) Western blot of the indicated  
527 phospho- and total proteins for key mitogenic signaling pathways downstream of Her2 at the  
528 indicated time points after the start of lapatinib treatment. The “Drug release” time point indicates  
529 48 hours after the removal of the drug from the media after the 2 months in lapatinib. D) Whole-  
530 transcriptome analyses of cells at the indicated stages of 1 $\mu$ M lapatinib treatment. Coloring  
531 reflects z-score of normalization across the conditions for each gene. The highlighted portion of  
532 the heatmap shows genes that are selectively upregulated at the resistance (2W: 2 weeks) and  
533 relapse (2M: 2 months) phases. E) The signatures that were most enriched for the highlighted  
534 genes in (D) based on GSEA analysis. Statistics: In (B), error bars show standard deviation of 3  
535 replicates, and is representative of multiple (>2) independent experiments. Densitometric  
536 quantitation of the immunoblotting data are provided in Supp. Table 1.

537 **Figure 2.** Her3 overexpression confers tumor cell growth under lapatinib. A) Total and phospho-  
538 Her3 levels at the indicated stages of lapatinib (1 $\mu$ M) treatment. B) Western blot of the indicated  
539 signaling proteins with and without shRNA-mediated knock-down of Her3 at the indicated stages  
540 of lapatinib treatment. C) Relative viability under the same conditions. D) Her3 was stably silenced  
541 or overexpressed in SKBR3 cells, and E) the relative cell growth was calculated after 1 $\mu$ M  
542 lapatinib treatment for the indicated time period. Statistics: error bars show standard deviations  
543 of 6 (C) or 3 (E) replicate experiments. \*\*\*:  $P < 0.01$  with student’s t-test. Densitometric  
544 quantitation of the immunoblotting data are provided in Supp. Table 1.

545 **Figure 3.** Protein homeostasis dynamics during the course of chronic lapatinib treatment. A)  
546 Immunofluorescence images of at the indicated stages of 1 $\mu$ M lapatinib treatment stained for  
547 newly synthesized proteins within a 30 min window using the Click-iT Protein Synthesis assay. B)  
548 Flow cytometry-based measurement of protein synthesis using the same conditions as in A using  
549 the Click-iT assay. Data is presented as mean fluorescence intensity (MFI).C) Protein synthesis  
550 rate measurement as in (B) in the indicated conditions with and without Her3 silencing. D) Western  
551 blots of the indicated ER stress response markers in the indicated conditions. Statistics: error bars  
552 show standard deviations of 2 (B-C) replicates. The data are representative of at least 2  
553 independent experiments. \*\*\*:  $P < 0.01$  with student’s t-test. Densitometric quantitation of the  
554 immunoblotting data are provided in Supp. Table 1.

555 **Figure 4.** Metabolomic reprogramming during chronic lapatinib treatment. A) Heatmap of the most  
556 notable altered intracellular metabolites between the different stages of 1 $\mu$ M lapatinib treatment,  
557 measured by NMR mass spectrometry. B) A model summarizing the effect of chronic lapatinib  
558 treatment on the glucose, energy and amino acid metabolism. Blue lines: reduced flux, red lines:  
559 increased flux at the relapse stage (2M). C) Western blot of O-GlcNAc-conjugated protein levels  
560 in the indicated conditions. O-GlcNAc levels may serve as a readout of the N-linked hexosamine  
561 (GlcNAc) levels. D) Intracellular glucose uptake assay measuring 2-deoxyglucose uptake with  
562 and without insulin after lapatinib treatment in SKBR3 cells. Her3 overexpression is unable to  
563 rescue the glucose uptake inhibition of lapatinib treatment. E) Overexpression of Her2 or Her3 in  
564 the non-transformed MCF10A cells induces similar activation of downstream pathways (p-Akt).  
565 F) Glucose uptake rates with control, Her2 or Her3 overexpression in MCF10A cells. Statistics:  
566 error bars show standard deviations from 2 replicate samples. Data are representative of 2  
567 independent experiments. \*\*\*:  $P < 0.01$  with student’s t-test. Densitometric quantitation of the  
568 immunoblotting data are provided in Supp. Table 1.

569 **Figure 5.** GADD34 overexpression during prolonged lapatinib treatment allows to overcome ER  
570 stress response-mediated inhibition of protein synthesis. A) Protein levels of GADD34  
571 (PPP1R15A) in the indicated conditions. B-C) Western blot of p-eIF2 (S51) under indicated  
572 conditions with and without treatment with guanabenz (GADD34 inhibitor) (B) or GADD34-  
573 targeting shRNA (C). D-E) Relative viability of cells at the control (parental) and relapse (2M)  
574 stages in response to 72hr treatment with guanabenz (D) or shRNA against GADD34 (E). F-G)  
575 Protein synthesis rate measurement with Click-iT Protein synthesis kit in the indicated stages of  
576 lapatinib treatment with and without guanabenz (F) or shRNA targeting GADD34 (G). Data is  
577 presented as mean fluorescence intensity (MFI). H) A model summarizing the signaling,  
578 metabolic and proteostatic changes during the acquisition of resistance to lapatinib in SKBR3  
579 cells. I) mRNA levels of PPP1R15A in the cohort of advanced Her2+ breast cancer patients with  
580 short (<1 year) or long (>3 years) duration of response to first-line trastuzumab therapy, from the  
581 Long-HER study [32]. Statistics: Error bars show standard deviations of 2 (D-E) or 3 (F-G)  
582 replicate samples. Data are representative of at least 2 independent experiments (D,F). \*\*\*:  $P <$   
583 0.01 with student's t-test. Densitometric quantitation of the immunoblotting data are provided in  
584 Supp. Table 1.

585 **Figure 6.** Acquired resistance to lapatinib creates hyper-dependence on ERAD for survival. A)  
586 Western of Ub (for poly-ubiquitinated proteins) and BiP (ER stress response marker) after  
587 silencing of p97 VCP in the indicated stages of lapatinib treatment. B) Images of Crystal Violet  
588 stained wells of 96-well plate after 72hrs of silencing of VCP in cells of the indicated stages of  
589 lapatinib exposure. C) Quantitation of the relative intensities of readings in (B). D-E) Similar to  
590 A,C but using 0.1 and 0.2 $\mu$ M treatment with CB-5083, a highly selective clinical grade inhibitor of  
591 VCP. Statistics: error bars show standard deviations from 6 replicate samples. Data are  
592 representative of at least 2 independent experiments. \*\*\*:  $P <$  0.01 with student's t-test.

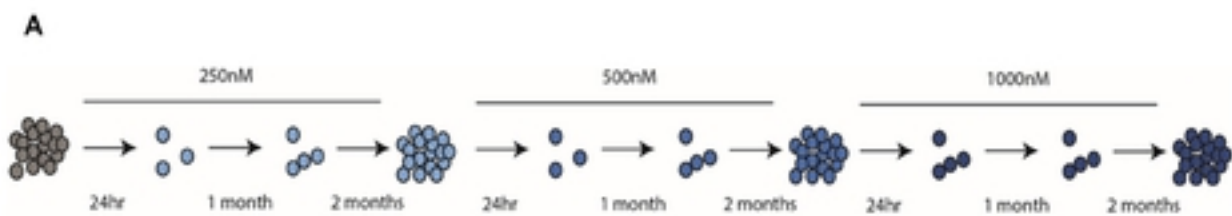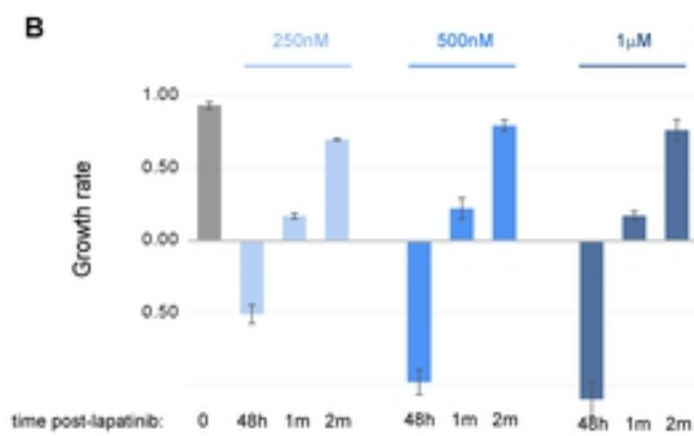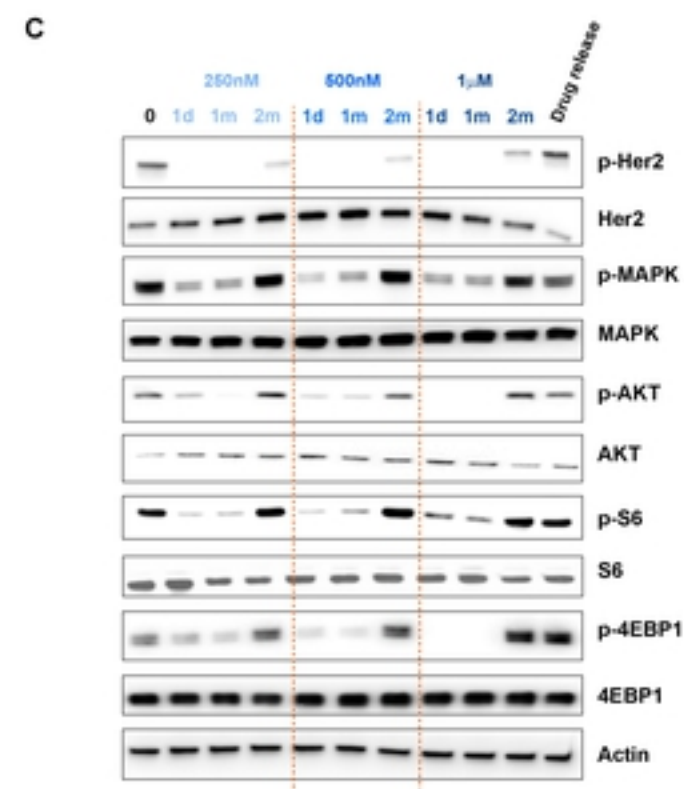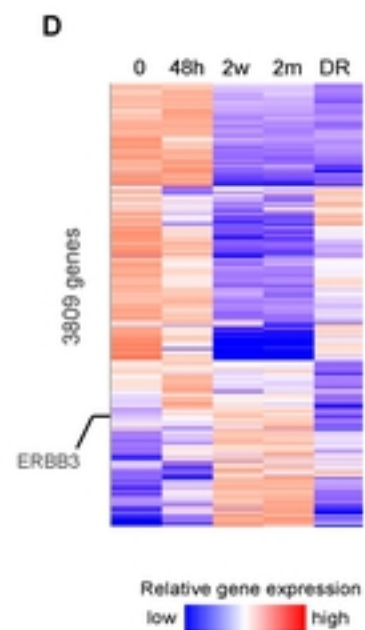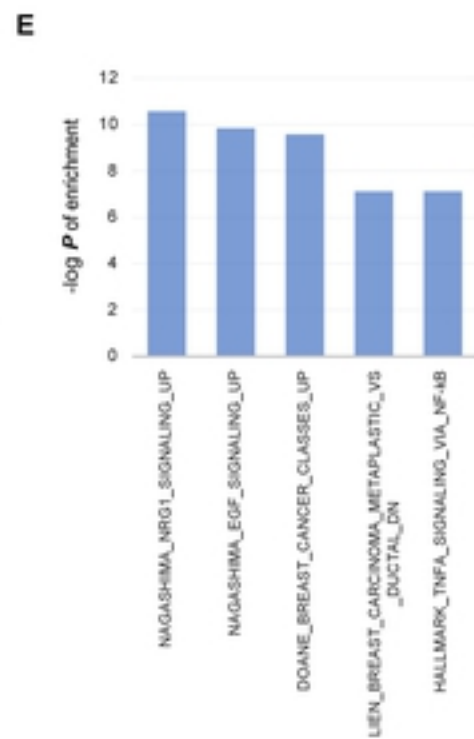



**A**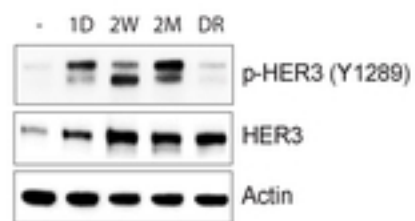**B**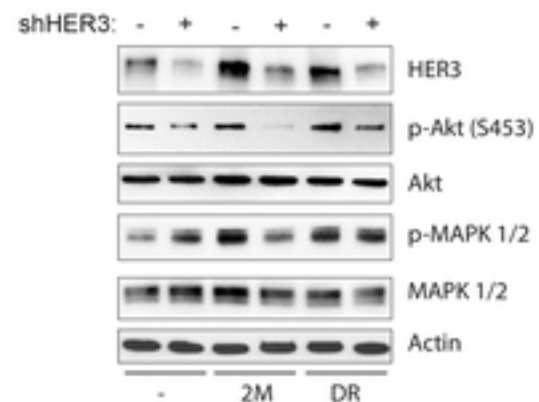**C**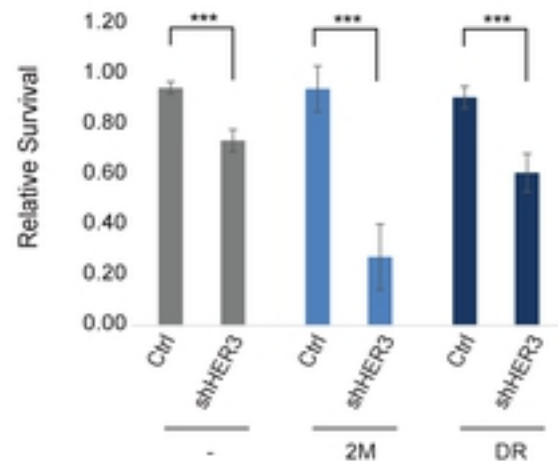**D**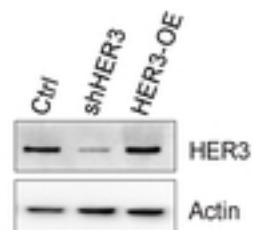**E**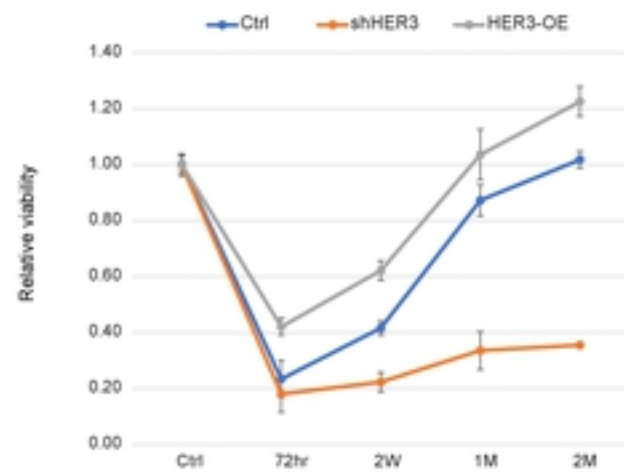

**A**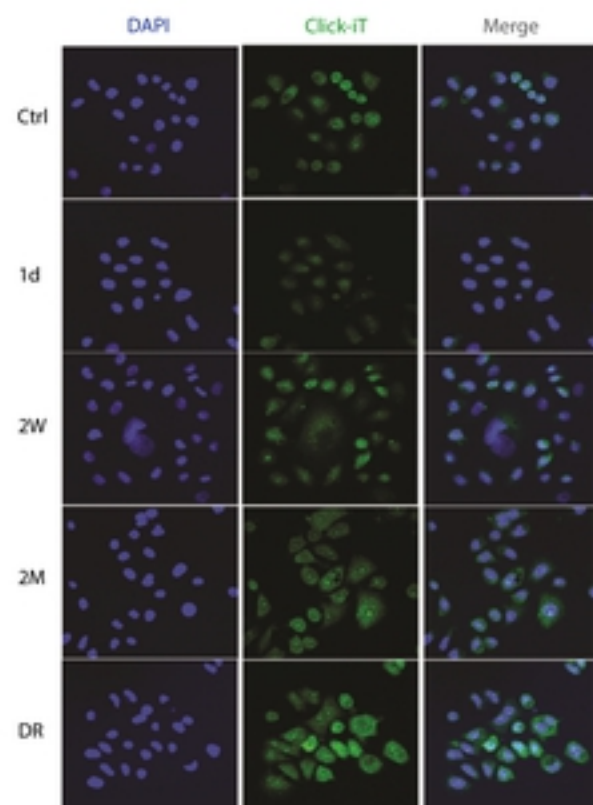**B**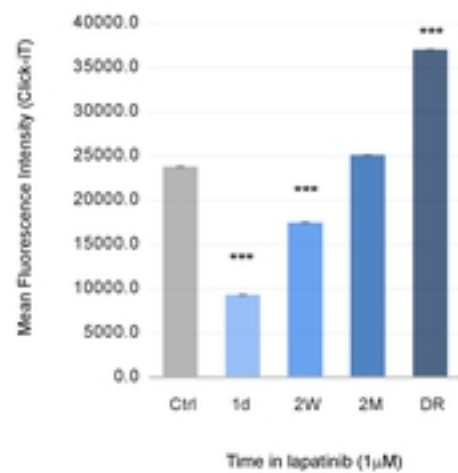**C**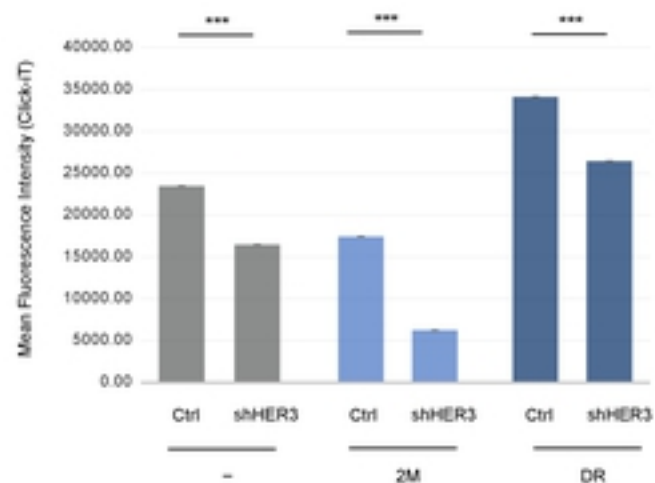**D**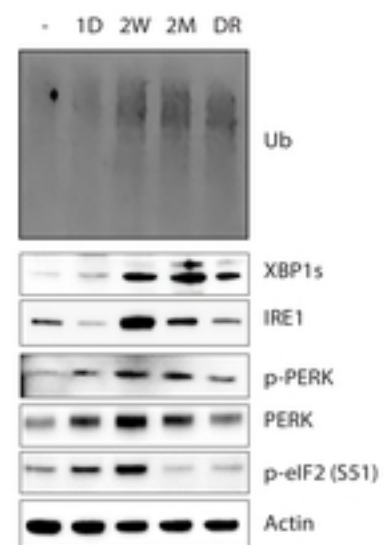

A

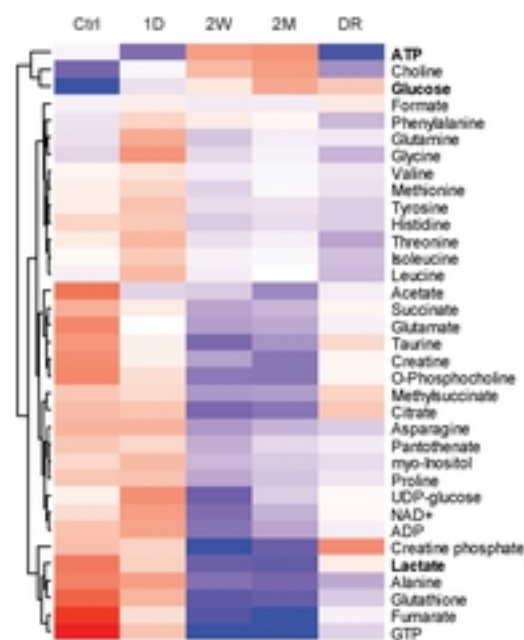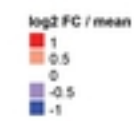

B

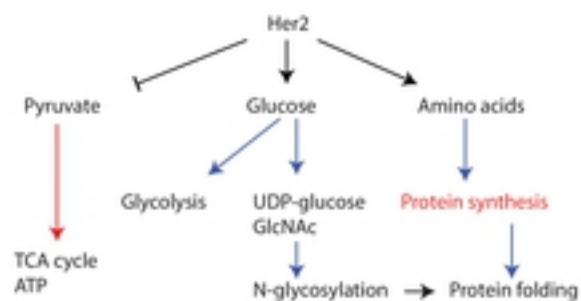

C

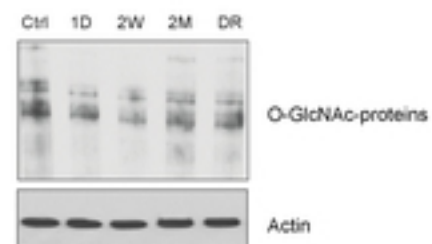

D

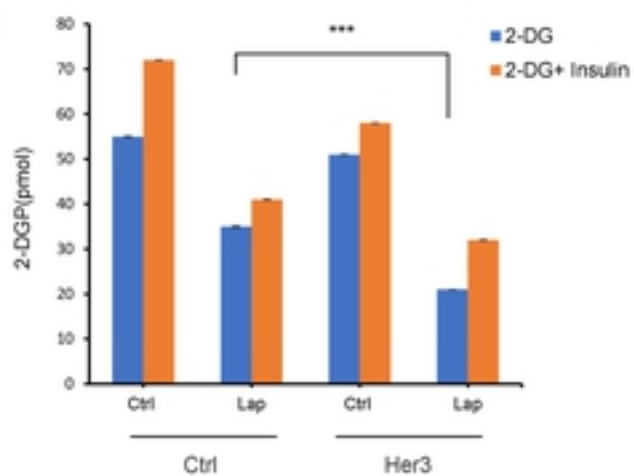

E

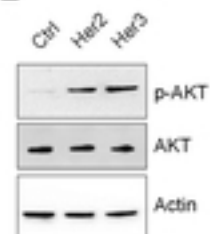

F

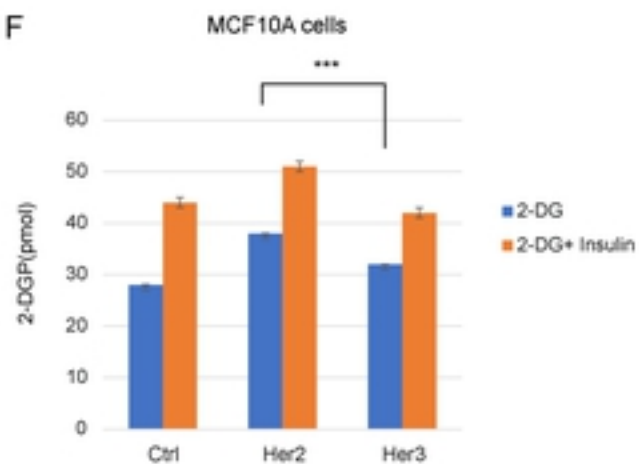

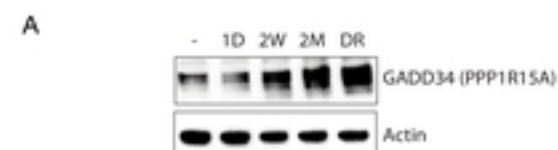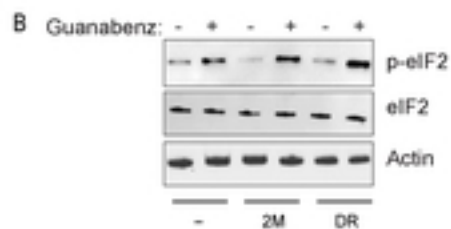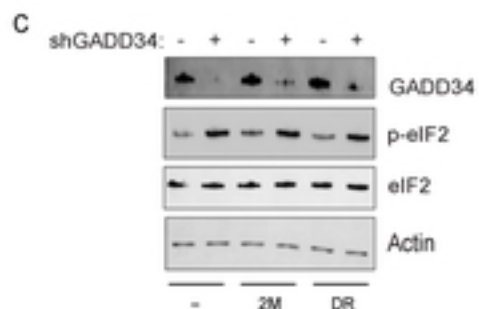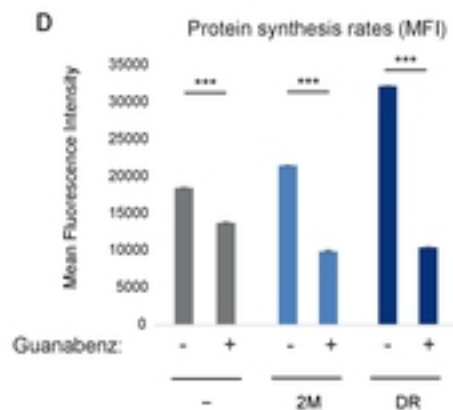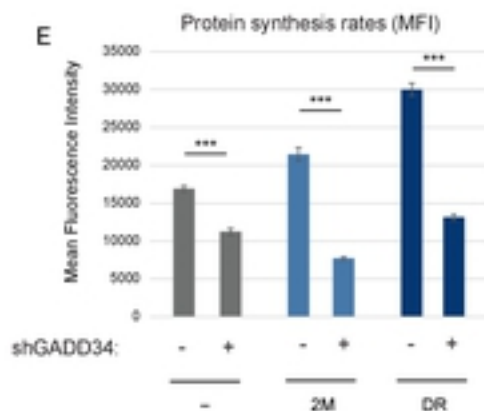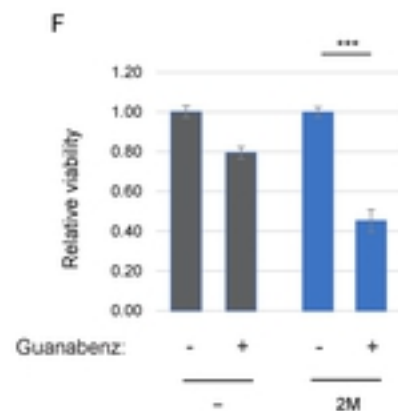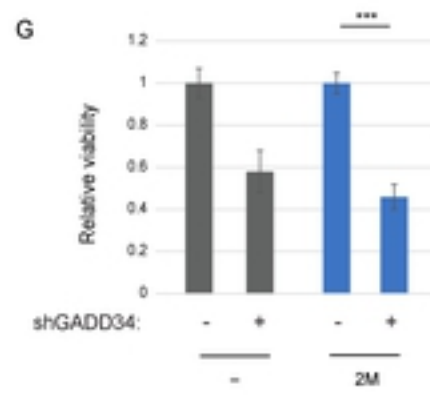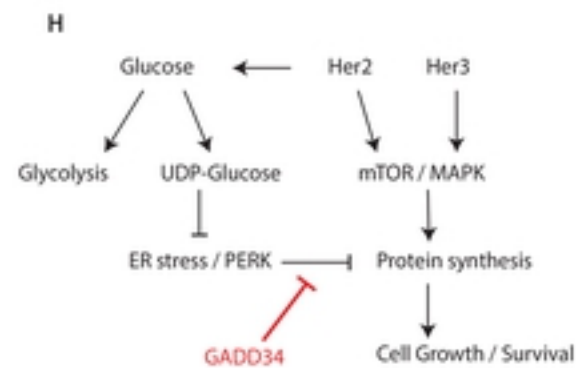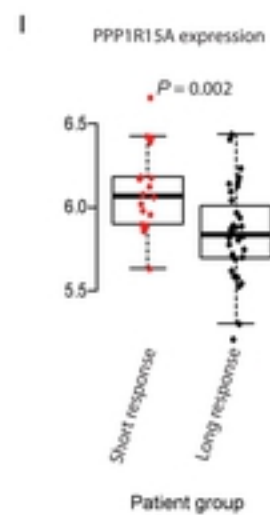

**A**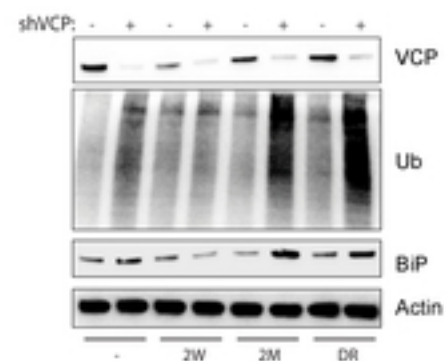**B**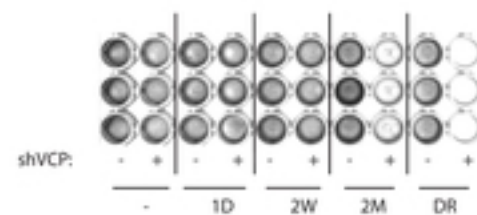**C**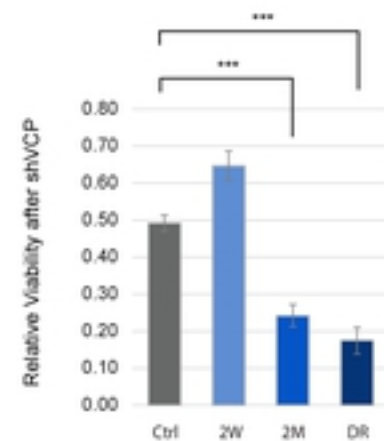**C**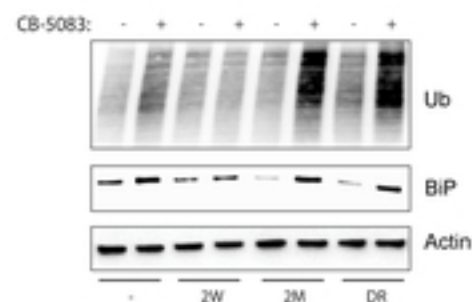**D**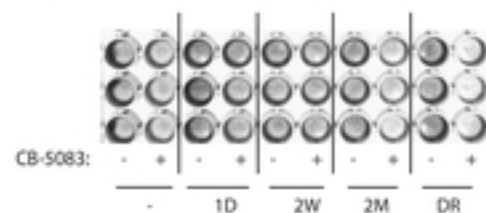**E**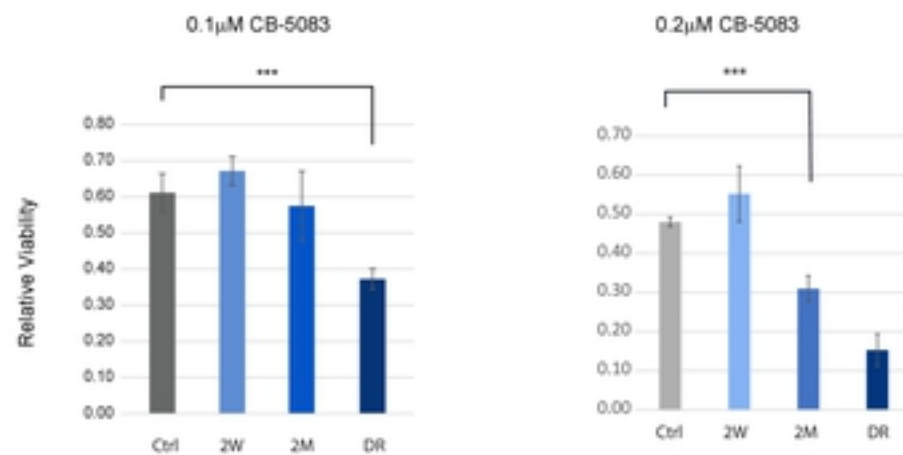

Source: http://biorxiv.org/content/10.1101/2021.08.18.456887v1.full.pdf
